# Supplementary material for: Patterned graphene oxide via one-step thermal annealing for controlling collective cell migration
Source: Royal Society of Chemistry journal article supplement (doi:10.1039/d4tb01091d), 2024-01-01
Supplement: d4tb01091d1.pdf [file d4tb01091d1.pdf]

Supplementary Information for

**Patterned graphene oxide via one-step thermal annealing for  
controlling collective cell migration**

Chien-Yu Huang,<sup>‡ab</sup> Chong-You Chen,<sup>‡ab</sup> Chia-Hung Wei,<sup>b</sup> Jia-Wei Yang,<sup>ab</sup> Yu-Chien Lin,<sup>b</sup> Chih-Fei Kao,<sup>\*c</sup> Johnson H.Y. Chung<sup>\*d</sup> and Guan-Yu Chen<sup>§\*abce</sup>

<sup>a</sup>Institute of Biomedical Engineering, College of Electrical and Computer Engineering, National Yang Ming Chiao Tung University, Hsinchu, 300093, Taiwan

<sup>b</sup>Department of Electrical and Computer Engineering, College of Electrical and Computer Engineering, National Yang Ming Chiao Tung University, Hsinchu, 300093, Taiwan

<sup>c</sup>Department of Biological Science and Technology, College of Biological Science and Technology, National Yang Ming Chiao Tung University, Hsinchu, 300093, Taiwan

<sup>d</sup>Intelligent Polymer Research Institute, Institute for Innovative Materials, University of Wollongong, 2500, NSW, Australia

<sup>e</sup>Center for Intelligent Drug Systems and Smart Bio-devices (IDS<sup>2</sup>B), National Yang Ming Chiao Tung University, Hsinchu, 300093, Taiwan

<sup>‡</sup> These authors contributed equally.

<sup>\*</sup> Corresponding authors

Phone: (886) 3-573-1920

FAX: (886) 3-573-1672

Email: guanyu@nycu.edu.tw

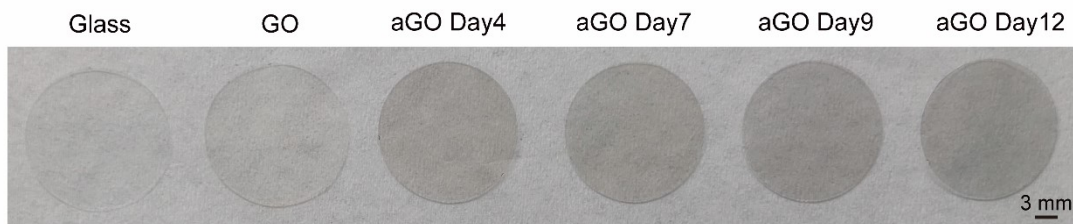

**Fig. S1.** Photos of glass, GO and aGO (Day 4, 7, 9, and 12) coating on glass.

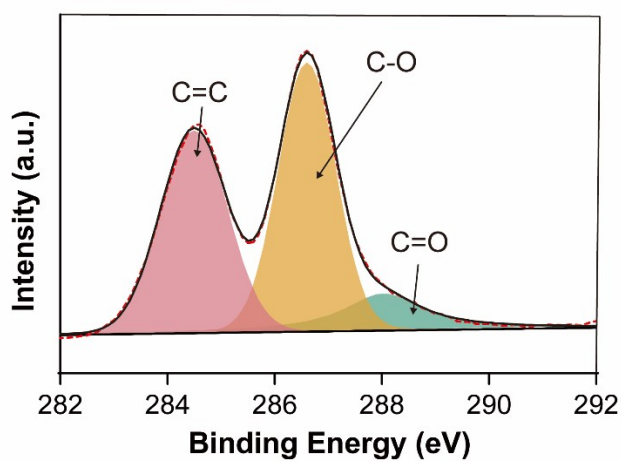

**Fig. S2.** C<sub>1s</sub> XPS spectra of GO.

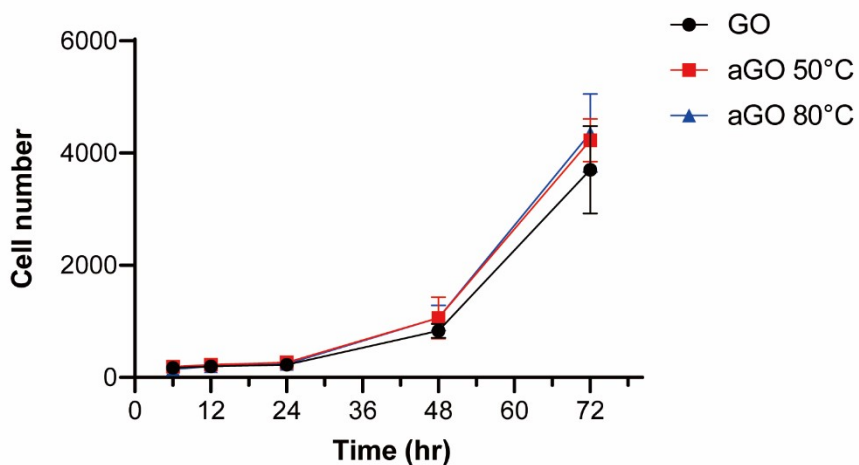

**Fig. S3.** Growth curve of HCT116 cells on different surfaces.

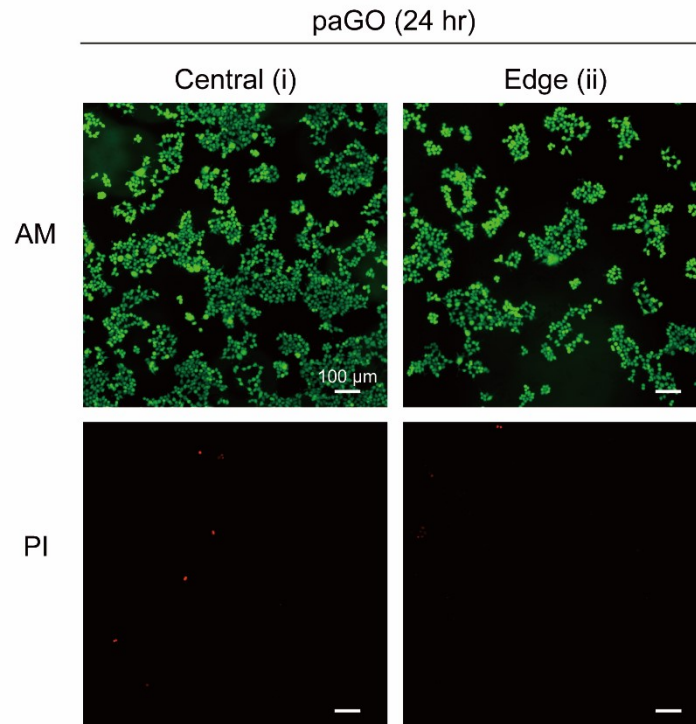

**Fig. S4.** Fluorescence images of Calcein-AM/PI stained Hct116 cells. The cells were cultured on paGO for 24 hr. Scale bar, 100  $\mu\text{m}$ .

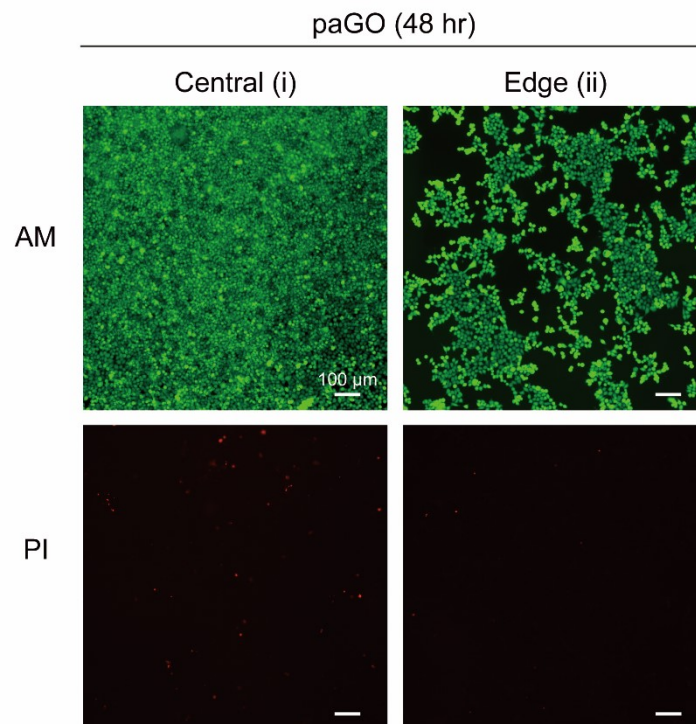

**Fig. S5.** Fluorescence images of Calcein-AM/PI stained Hct116 cells. The cells were cultured on paGO for 48 hr. Scale bar, 100  $\mu\text{m}$ .

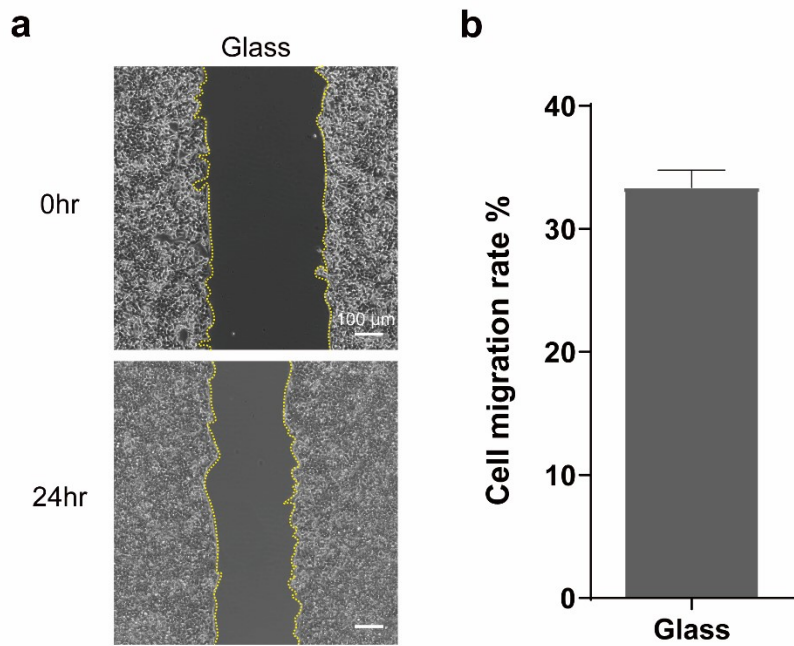

**Fig. S6.** The cell migration on glass interface. (a) Bright-field microscopy images of cells at the start and after 24 hours of migration. Scale bar, 100  $\mu\text{m}$ . (b) The cell migration rate of glass.

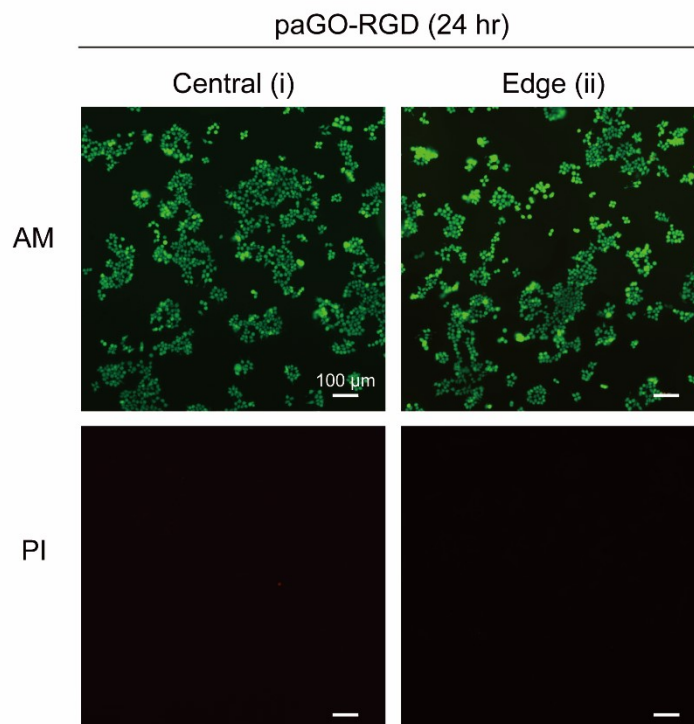

**Fig. S7.** Fluorescence images of Calcein-AM/PI stained Hct116 cells. The cells were

cultured on paGO-RGD for 24 hr. Scale bar, 100  $\mu$ m.

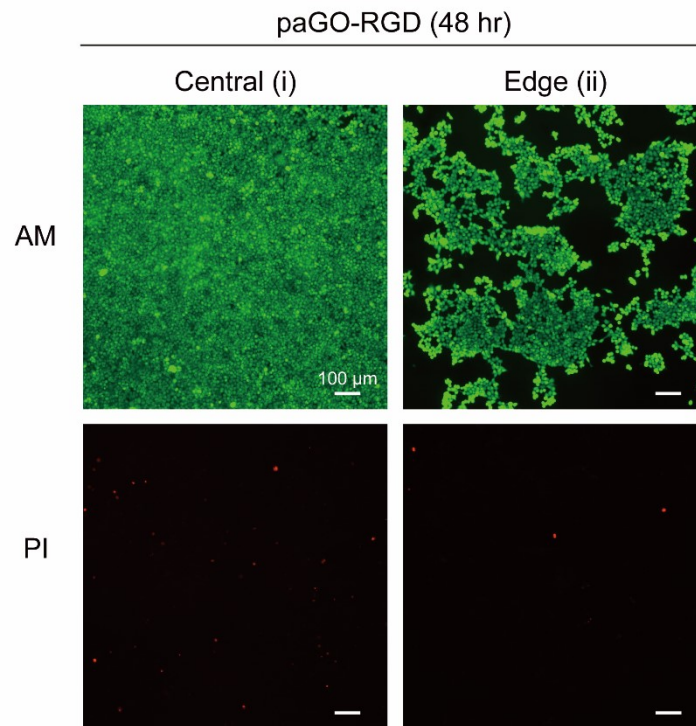

**Fig. S8.** Fluorescence images of Calcein-AM/PI stained Hct116 cells. The cells were cultured on paGO-RGD for 48 hr. Scale bar, 100  $\mu$ m.

**Table S1.** Analysis of O<sub>1s</sub> peaks obtained from XPS for PaGO

| Sample                | Relative area of different chemical bonds (%) |                 |
|-----------------------|-----------------------------------------------|-----------------|
|                       | C=O/O=C-OH (~531.5 eV)                        | C-O (~532.5 eV) |
| GO                    | 53.6                                          | 46.4            |
| paGO Day1 Central (i) | 32.9                                          | 67.1            |
| paGO Day1 Edge (ii)   | 45.4                                          | 54.6            |
| paGO Day4 Central (i) | 35.4                                          | 64.6            |
| paGO Day4 Edge (ii)   | 43.5                                          | 56.5            |
| paGO Day7 Central (i) | 31.3                                          | 68.7            |
| paGO Day7 Edge (ii)   | 39.1                                          | 60.9            |

**Table S2.** Analysis of C<sub>1s</sub> peaks obtained from XPS for PaGO-RGD

| Sample                  | Relative area of different chemical bonds (%) |                 |                    |                     |                    |
|-------------------------|-----------------------------------------------|-----------------|--------------------|---------------------|--------------------|
|                         | C=C<br>(284.6 eV)                             | C=N<br>(286 eV) | C-O<br>(~286.6 eV) | N-C=O<br>(287.3 eV) | C=O<br>(~288.5 eV) |
| paGO-RGD<br>Central (i) | 45.1                                          | 28.2            | 13.4               | 5.8                 | 7.6                |
| paGO-RGD<br>Edge (ii)   | 56.6                                          | 20.0            | 7.6                | 6.7                 | 9.1                |

**Description of the Supplementary Videos:**

**Video. S1** Thermal simulation model of paGO under single-point heating.
